# Supplementary material
Source: PubMed Central journal article supplement (PMC4237999)

SUPPLEMENTARY DATA

**Supplementary Table 1.** Primer Sequences used for the expression quantitative trait loci (eQTL) analysis of the genes and isoforms in LD block 16p13.13

| NCBI Ref Seq     | Gene                   | Forward Primer          | Reverse Primer           | Size (bp) |
|------------------|------------------------|-------------------------|--------------------------|-----------|
| BQ221200         | <i>CIITA III</i> *     | ggggaagctgagggcacg      | gaagctccaggtagccacctcta  | 182       |
| BM147267         | <i>CIITA IV</i> *      | gcgcccccagagctgg        | gaagctccaggtagccacctcta  | 125       |
| NM_015226.2      | <i>CLEC16A Iso I</i>   | cgcatgaagatgcagagaat    | ggtggcgactgtgaggac       | 257       |
| BC112897.1       | <i>CLEC16A Iso II</i>  | ctctgtggagcctgtgtgag    | tgttaatcttgcgctgtgc      | 102       |
| AK126771.1       | <i>CLEC16A Iso III</i> | acagcccagagtcagca       | actcatggggcatctgaat      | 157       |
| NM_014015.3      | <i>DEXI</i> †          | agtagggctcgcactgctgcttc | acctctctgtggcacgaag      | 192       |
| NM_003745.1      | <i>SOCS</i>            | gcccctctgtaggatggta     | ggaggaagaggaggaaggtt     | 104       |
| NM_002046.3      | <i>GAPDH</i>           | cagccgagccacatcgc       | catgggtggaatcatattggaaca | 186       |
|                  |                        |                         |                          |           |
| Novel Transcript | <i>CIITA V</i>         | acctgcaacaacaggattcac   | caccaacacctcagattcatc    | 105       |
| Novel Transcript | <i>CIITA VI</i>        | agctcgtgccagccttc       | ggattctcgcttgccctgt      | 159       |

\**CIITA III* and *CIITA IV* primers were originally designed by Hornell 2003 (50)

†There are two intron-less *DEXI* pseudogenes (retro-*DEXI*) located on chromosome 15 at coordinates (Hg19) (29,033,933-29,035,470) and (23,157,046-23,158,548) whose genomic DNA matches almost exactly the cDNA for *DEXI*. The forward primer has one nucleotide difference at the 3' end (**bold**) that differ from the pseudogenes.

SUPPLEMENTARY DATA

**Supplementary Table 2.** SNPs in *CLEC16A* most strongly associated with type 1 diabetes (total 48) from TDT analysis sorted in order of base position.

| SNP Name    | Position (Hg19) | MAF*  | Minor Allele | Major Allele | Transmitted Minor Allele Count | Untransmitted Minor Allele Count | TDT P-value† | Odds Ratio‡         | Location‡ |
|-------------|-----------------|-------|--------------|--------------|--------------------------------|----------------------------------|--------------|---------------------|-----------|
| rs12708713  | 11072459        | 0.167 | T            | C            | 1045                           | 1239                             | 4.92E-05     | 0.843 (0.777-0.916) | Intron 8  |
| rs12708714  | 11072525        | 0.168 | C            | T            | 1048                           | 1244                             | 4.24E-05     | 0.842 (0.776-0.915) | Intron 8  |
| rs7403919   | 11085968        | 0.341 | C            | T            | 1691                           | 1938                             | 4.13E-05     | 0.873 (0.818-0.931) | Intron 10 |
| rs8062322   | 11092319        | 0.289 | A            | C            | 1529                           | 1768                             | 3.15E-05     | 0.865 (0.808-0.926) | Intron 10 |
| rs9926367   | 11093179        | 0.288 | C            | T            | 1520                           | 1759                             | 3.00E-05     | 0.864 (0.807-0.926) | Intron 10 |
| rs7200940   | 11164567        | 0.307 | G            | C            | 1556                           | 1804                             | 1.88E-05     | 0.863 (0.806-0.923) | Intron 19 |
| rs11860603  | 11165017        | 0.305 | C            | T            | 1546                           | 1796                             | 1.53E-05     | 0.861 (0.804-0.921) | Intron 19 |
| rs9934969   | 11166002        | 0.303 | A            | G            | 1540                           | 1795                             | 1.01E-05     | 0.858 (0.802-0.918) | Intron 19 |
| rs11865121§ | 11166688        | 0.304 | A            | C            | 1544                           | 1798                             | 1.11E-05     | 0.859 (0.802-0.919) | Intron 19 |
| rs7198621   | 11167458        | 0.304 | G            | C            | 1538                           | 1779                             | 2.86E-05     | 0.865 (0.808-0.926) | Intron 19 |
| rs725613    | 11169683        | 0.336 | C            | A            | 1625                           | 1874                             | 2.56E-05     | 0.867 (0.811-0.927) | Intron 19 |
| rs12925642  | 11171602        | 0.304 | G            | A            | 1548                           | 1797                             | 1.67E-05     | 0.861 (0.805-0.922) | Intron 19 |
| rs2058531   | 11172109        | 0.305 | G            | A            | 1554                           | 1807                             | 1.28E-05     | 0.860 (0.804-0.920) | Intron 19 |
| rs9652601   | 11174365        | 0.306 | A            | G            | 1557                           | 1792                             | 4.89E-05     | 0.869 (0.812-0.93)  | Intron 19 |
| rs9652582   | 11174564        | 0.300 | A            | G            | 1536                           | 1783                             | 1.81E-05     | 0.862 (0.805-0.922) | Intron 19 |
| rs2041670   | 11174652        | 0.300 | T            | C            | 1537                           | 1785                             | 1.69E-05     | 0.861 (0.804-0.922) | Intron 19 |
| rs11648679  | 11175984        | 0.335 | G            | A            | 1623                           | 1877                             | 1.76E-05     | 0.865 (0.809-0.924) | Intron 19 |
| rs12708715  | 11177824        | 0.301 | T            | C            | 1542                           | 1795                             | 1.19E-05     | 0.859 (0.803-0.92)  | Intron 19 |
| rs9929994   | 11178245        | 0.336 | G            | A            | 1617                           | 1873                             | 1.47E-05     | 0.863 (0.808-0.923) | Intron 19 |
| rs12708716  | 11179873        | 0.333 | G            | A            | 1615                           | 1866                             | 2.10E-05     | 0.866 (0.810-0.925) | Intron 19 |
| rs9888908   | 11181244        | 0.300 | A            | C            | 1539                           | 1790                             | 1.36E-05     | 0.860 (0.803-0.92)  | Intron 19 |
| rs7203793   | 11182134        | 0.335 | G            | C            | 1626                           | 1876                             | 2.39E-05     | 0.867 (0.811-0.926) | Intron 19 |
| rs12924729¶ | 11187783        | 0.305 | A            | G            | 1565                           | 1806                             | 3.31E-05     | 0.867 (0.810-0.927) | Intron 19 |
| rs12928537  | 11191400        | 0.303 | A            | G            | 1550                           | 1798                             | 1.82E-05     | 0.862 (0.806-0.923) | Intron 19 |
| rs12927355  | 11194771        | 0.302 | T            | C            | 1556                           | 1802                             | 2.18E-05     | 0.864 (0.807-0.924) | Intron 19 |
| rs741172    | 11200798        | 0.300 | T            | C            | 1551                           | 1803                             | 1.35E-05     | 0.860 (0.804-0.921) | Intron 19 |
| rs9746695   | 11207894        | 0.302 | C            | T            | 1550                           | 1799                             | 1.69E-05     | 0.862 (0.805-0.922) | Intron 19 |
| rs12935413  | 11210447        | 0.333 | A            | G            | 1617                           | 1865                             | 2.64E-05     | 0.867 (0.811-0.927) | Intron 19 |
| rs34306440# | 11215035        | 0.209 | G            | A            | 1203                           | 1436                             | 5.74E-06     | 0.838 (0.776-0.904) | Intron 20 |
| rs35032408  | 11215424        | 0.208 | G            | T            | 1204                           | 1429                             | 1.16E-05     | 0.843 (0.780-0.910) | Intron 20 |
| rs8064154   | 11219419        | 0.338 | G            | A            | 1610                           | 1870                             | 1.05E-05     | 0.861 (0.806-0.920) | Intron 21 |
| rs12924112  | 11219720        | 0.336 | G            | T            | 1589                           | 1849                             | 9.24E-06     | 0.859 (0.804-0.919) | Intron 21 |
| rs34540843  | 11221287        | 0.242 | G            | A            | 1332                           | 1555                             | 3.32E-05     | 0.857 (0.796-0.922) | Intron 22 |
| rs36045143  | 11224966        | 0.242 | G            | A            | 1332                           | 1564                             | 1.62E-05     | 0.852 (0.792-0.916) | Intron 22 |
| rs2241099   | 11225064        | 0.241 | G            | C            | 1325                           | 1555                             | 1.82E-05     | 0.852 (0.792-0.917) | Intron 22 |
| rs12919828  | 11226779        | 0.243 | G            | A            | 1335                           | 1567                             | 1.66E-05     | 0.852 (0.792-0.917) | Intron 22 |
| rs35732840  | 11228355        | 0.336 | G            | T            | 1606                           | 1860                             | 1.60E-05     | 0.863 (0.808-0.923) | Intron 22 |
| rs62026376  | 11228712        | 0.243 | T            | C            | 1331                           | 1569                             | 9.89E-06     | 0.848 (0.789-0.913) | Intron 22 |

SUPPLEMENTARY DATA

|            |          |       |   |   |      |      |          |                     |           |
|------------|----------|-------|---|---|------|------|----------|---------------------|-----------|
| rs62026377 | 11229128 | 0.243 | T | G | 1327 | 1564 | 1.04E-05 | 0.849 (0.789-0.913) | Intron 22 |
| rs7203459  | 11230703 | 0.242 | C | T | 1324 | 1558 | 1.31E-05 | 0.850 (0.790-0.914) | Intron 22 |
| rs2867880  | 11231857 | 0.334 | A | G | 1604 | 1856 | 1.84E-05 | 0.864 (0.808-0.924) | Intron 22 |
| rs12919732 | 11235123 | 0.244 | G | A | 1321 | 1558 | 1.00E-05 | 0.848 (0.788-0.912) | Intron 22 |
| rs2903692  | 11238783 | 0.330 | A | G | 1581 | 1844 | 6.99E-06 | 0.857 (0.802-0.917) | Intron 22 |
| rs4322688  | 11238991 | 0.332 | G | C | 1590 | 1856 | 5.86E-06 | 0.857 (0.801-0.916) | Intron 22 |
| rs12930373 | 11239599 | 0.331 | A | G | 1590 | 1847 | 1.17E-05 | 0.861 (0.805-0.921) | Intron 22 |
| rs12917893 | 11239978 | 0.331 | T | A | 1584 | 1842 | 1.04E-05 | 0.860 (0.804-0.92)  | Intron 22 |
| rs62026379 | 11241806 | 0.241 | A | G | 1314 | 1556 | 6.27E-06 | 0.845 (0.785-0.909) | Intron 22 |
| rs17673553 | 11241906 | 0.242 | G | A | 1326 | 1558 | 1.56E-05 | 0.851 (0.791-0.916) | Intron 22 |

\*MAF was calculated from the founders (4,655 individuals). †TDT *P*-values and Odds Ratio were calculated from the 3,070 multiplex families (12,485 individuals). ‡ Intronic regions were based on Ensembl (CLEC16A - 001 ENST00000409790) (51). §GWAS reported SNP in association with multiple sclerosis (8). || GWAS reported SNPs in association with type 1 diabetes (3,4). ¶GWAS reported SNP previously reported in association with primary biliary cirrhosis (11).GWAS reported SNPs were limited to the dbGAP NHGRI GWAS catalog. #Most significant SNP associated with type 1 diabetes. MAF, minor allele frequency.

SUPPLEMENTARY DATA

**Supplementary Table 3.** SNPs Significantly Associated with Type 1 Diabetes with their Corresponding eQTL Results for *DEXI*

| SNP         | Position (Hg19) | Minor Allele | $\beta^*$ | STAT* | P-value* | $r^2$ rs7403919† | $r^2$ rs34306440‡ | Location‡ |
|-------------|-----------------|--------------|-----------|-------|----------|------------------|-------------------|-----------|
| rs7403919   | 11085968        | C            | 0.9029    | 4.404 | 1.25E-04 | 1.000            | 0.533             | Intron 10 |
| rs725613    | 11169683        | C            | 0.8884    | 4.289 | 1.72E-04 | 0.940            | 0.501             | Intron 19 |
| rs11648679  | 11175984        | G            | 0.8884    | 4.289 | 1.72E-04 | 0.940            | 0.501             | Intron 19 |
| rs9929994   | 11178245        | G            | 0.8884    | 4.289 | 1.72E-04 | 0.940            | 0.501             | Intron 19 |
| rs12708716  | 11179873        | G            | 0.8884    | 4.289 | 1.72E-04 | 0.940            | 0.501             | Intron 19 |
| rs7203793   | 11182134        | G            | 0.8884    | 4.289 | 1.72E-04 | 0.940            | 0.501             | Intron 19 |
| rs12935413  | 11210447        | A            | 0.8884    | 4.289 | 1.72E-04 | 0.940            | 0.501             | Intron 19 |
| rs8064154   | 11219419        | G            | 0.8884    | 4.289 | 1.72E-04 | 0.940            | 0.501             | Intron 21 |
| rs12924112  | 11219720        | G            | 0.8884    | 4.289 | 1.72E-04 | 0.940            | 0.501             | Intron 21 |
| rs4322688   | 11238991        | G            | 0.8884    | 4.289 | 1.72E-04 | 0.940            | 0.501             | Intron 22 |
| rs12930373  | 11239599        | A            | 0.8884    | 4.289 | 1.72E-04 | 0.940            | 0.501             | Intron 22 |
| rs2903692   | 11238783        | A            | 0.8884    | 4.289 | 1.72E-04 | 0.940            | 0.529             | Intron 22 |
| rs35732840  | 11228355        | G            | 0.8934    | 4.306 | 1.64E-04 | 0.875            | 0.467             | Intron 22 |
| rs2867880   | 11231857        | A            | 0.8934    | 4.306 | 1.64E-04 | 0.875            | 0.467             | Intron 22 |
| rs12917893  | 11239978        | T            | 0.8518    | 3.994 | 3.88E-04 | 0.875            | 0.467             | Intron 22 |
| rs7200940   | 11164567        | G            | 0.7586    | 3.799 | 6.61E-04 | 0.844            | 0.645             | Intron 19 |
| rs8062322   | 11092319        | A            | 0.7974    | 3.502 | 1.47E-03 | 0.834            | 0.578             | Intron 10 |
| rs9926367   | 11093179        | C            | 0.7974    | 3.502 | 1.47E-03 | 0.834            | 0.578             | Intron 10 |
| rs11860603  | 11165017        | C            | 0.7596    | 3.586 | 1.17E-03 | 0.790            | 0.622             | Intron 19 |
| rs9934969   | 11166002        | A            | 0.7596    | 3.586 | 1.17E-03 | 0.790            | 0.622             | Intron 19 |
| rs11865121  | 11166688        | A            | 0.7596    | 3.586 | 1.17E-03 | 0.790            | 0.622             | Intron 19 |
| rs7198621   | 11167458        | G            | 0.7596    | 3.586 | 1.17E-03 | 0.790            | 0.622             | Intron 19 |
| rs12925642  | 11171602        | G            | 0.7596    | 3.586 | 1.17E-03 | 0.790            | 0.622             | Intron 19 |
| rs2058531   | 11172109        | G            | 0.7596    | 3.586 | 1.17E-03 | 0.790            | 0.622             | Intron 19 |
| rs9652601   | 11174365        | A            | 0.7596    | 3.586 | 1.17E-03 | 0.790            | 0.622             | Intron 19 |
| rs9652582   | 11174564        | A            | 0.7596    | 3.586 | 1.17E-03 | 0.790            | 0.622             | Intron 19 |
| rs2041670   | 11174652        | T            | 0.7596    | 3.586 | 1.17E-03 | 0.790            | 0.622             | Intron 19 |
| rs12708715  | 11177824        | T            | 0.7596    | 3.586 | 1.17E-03 | 0.790            | 0.622             | Intron 19 |
| rs9888908   | 11181244        | A            | 0.7596    | 3.586 | 1.17E-03 | 0.790            | 0.622             | Intron 19 |
| rs12928537  | 11191400        | A            | 0.7596    | 3.586 | 1.17E-03 | 0.790            | 0.622             | Intron 19 |
| rs12927355  | 11194771        | T            | 0.7596    | 3.586 | 1.17E-03 | 0.790            | 0.622             | Intron 19 |
| rs741172    | 11200798        | T            | 0.7596    | 3.586 | 1.17E-03 | 0.790            | 0.622             | Intron 19 |
| rs9746695   | 11207894        | C            | 0.7596    | 3.586 | 1.17E-03 | 0.790            | 0.622             | Intron 19 |
| rs12924729  | 11187783        | A            | 0.6429    | 3.1   | 4.19E-03 | 0.737            | 0.511             | Intron 19 |
| rs34540843  | 11221287        | G            | 0.9382    | 2.98  | 5.67E-03 | 0.600            | 0.680             | Intron 22 |
| rs62026379  | 11241806        | A            | 0.9382    | 2.98  | 5.67E-03 | 0.600            | 0.680             | Intron 22 |
| rs17673553  | 11241906        | G            | 0.9382    | 2.98  | 5.67E-03 | 0.600            | 0.680             | Intron 22 |
| rs34306440§ | 11215035        | G            | 0.8521    | 2.561 | 1.57E-02 | 0.533            | 1.000             | Intron 20 |

SUPPLEMENTARY DATA

|            |          |   |        |       |          |       |       |           |
|------------|----------|---|--------|-------|----------|-------|-------|-----------|
| rs35032408 | 11215424 | G | 0.8521 | 2.561 | 1.57E-02 | 0.533 | 1.000 | Intron 20 |
| rs36045143 | 11224966 | G | 0.9253 | 2.95  | 6.10E-03 | 0.500 | 0.600 | Intron 22 |
| rs2241099  | 11225064 | G | 0.9253 | 2.95  | 6.10E-03 | 0.500 | 0.600 | Intron 22 |
| rs62026376 | 11228712 | T | 0.9253 | 2.95  | 6.10E-03 | 0.500 | 0.600 | Intron 22 |
| rs62026377 | 11229128 | T | 0.9253 | 2.95  | 6.10E-03 | 0.500 | 0.600 | Intron 22 |
| rs12919732 | 11235123 | G | 0.8494 | 2.649 | 1.28E-02 | 0.500 | 0.600 | Intron 22 |
| rs12919828 | 11226779 | G | 0.9253 | 2.95  | 6.10E-03 | 0.485 | 0.592 | Intron 22 |
| rs7203459  | 11230703 | C | 0.8583 | 2.663 | 1.23E-02 | 0.412 | 0.529 | Intron 22 |
| rs12708713 | 11072459 | T | 0.5901 | 1.6   | 1.20E-01 | 0.394 | 0.638 | Intron 8  |
| rs12708714 | 11072525 | C | 0.5901 | 1.6   | 1.20E-01 | 0.394 | 0.638 | Intron 8  |

Samples are sorted in order of  $r^2$  relative to rs7403919 (most significant SNP that is associated with *DEXI* expression levels). \*Statistical analysis performed using expression and genotyping data. † $r^2$  values were calculated using genotyping data for 33 HapMap samples and the designated SNP as reference. ‡Intronic regions were based on Ensembl (CLEC16A - 001 ENST00000409790) (51). §Most Significant SNP associated with type 1 diabetes.  $\beta$ , linear regression coefficient; STAT, coefficient t-statistic;  $r^2$ , correlation.

**Supplementary Figure 1.** New Isoforms of *CIITA* were identified that have exons that splice either into the middle intronic region of *DEXI* or splice into exon 1 of *DEXI*. These two isoforms have been named *CIITA V*, and *CIITA VI*. Start sites of the new isoforms are not known. Primers were designed that amplified these two new isoforms. The exact locations of primers are noted in the above figure. The reverse primer for *CIITA VI* straddled two exons (designated by the dotted line).

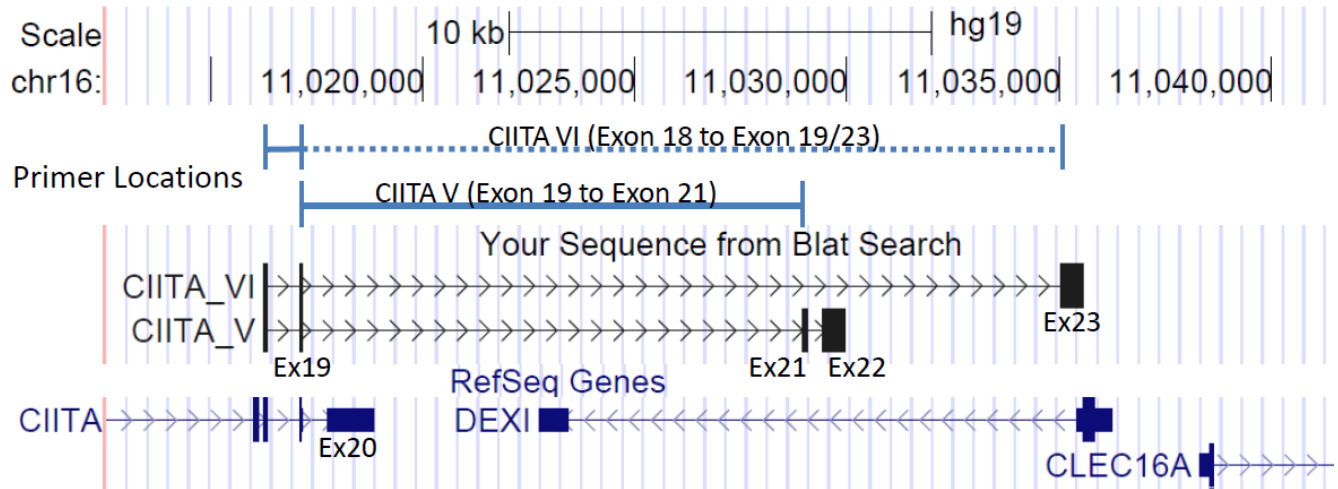

SUPPLEMENTARY DATA

**Supplementary Figure 2.** Association between SNP alleles and transcript levels for genes in chromosomal region 16p13.13. The  $-\log(P\text{-value})$  for the association is plotted relative to physical position on the chromosome for each SNP. The  $r^2$  is plotted relative to the most significant SNP.

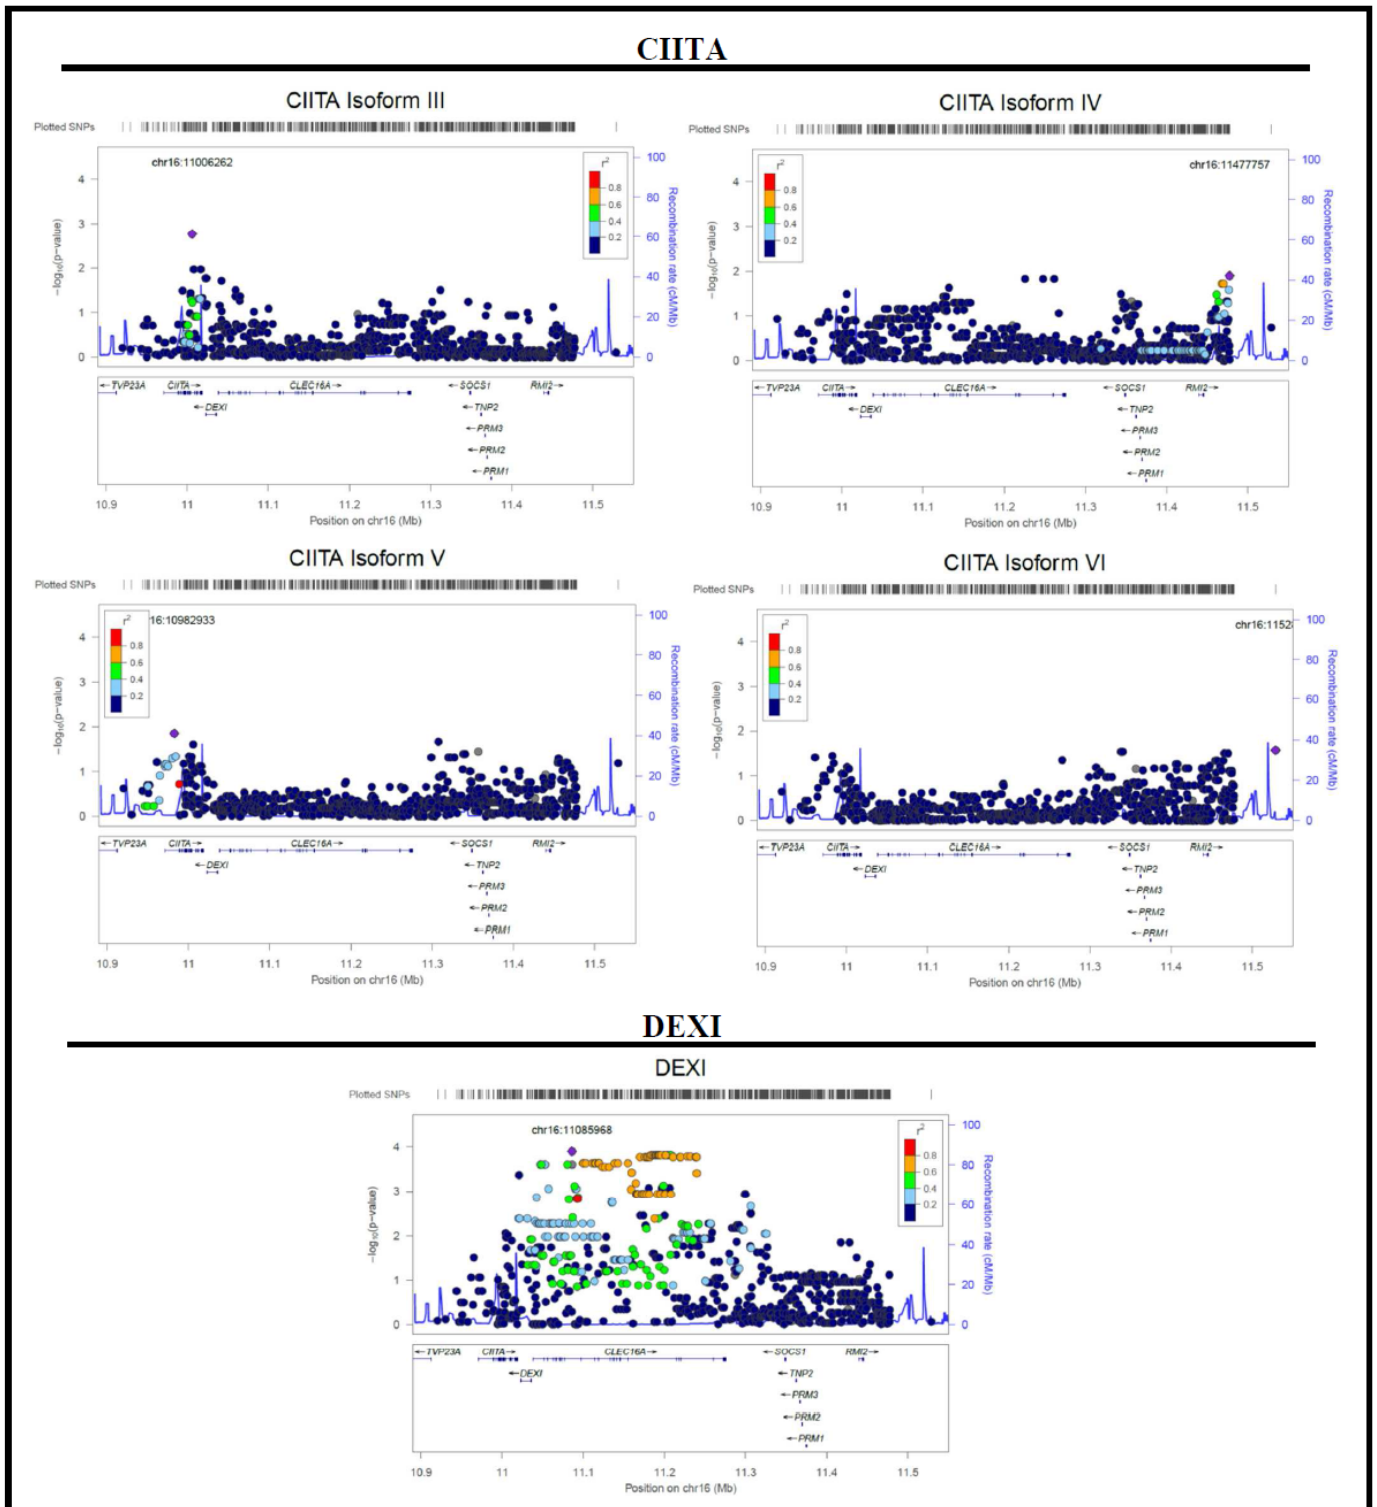

CLEC16A

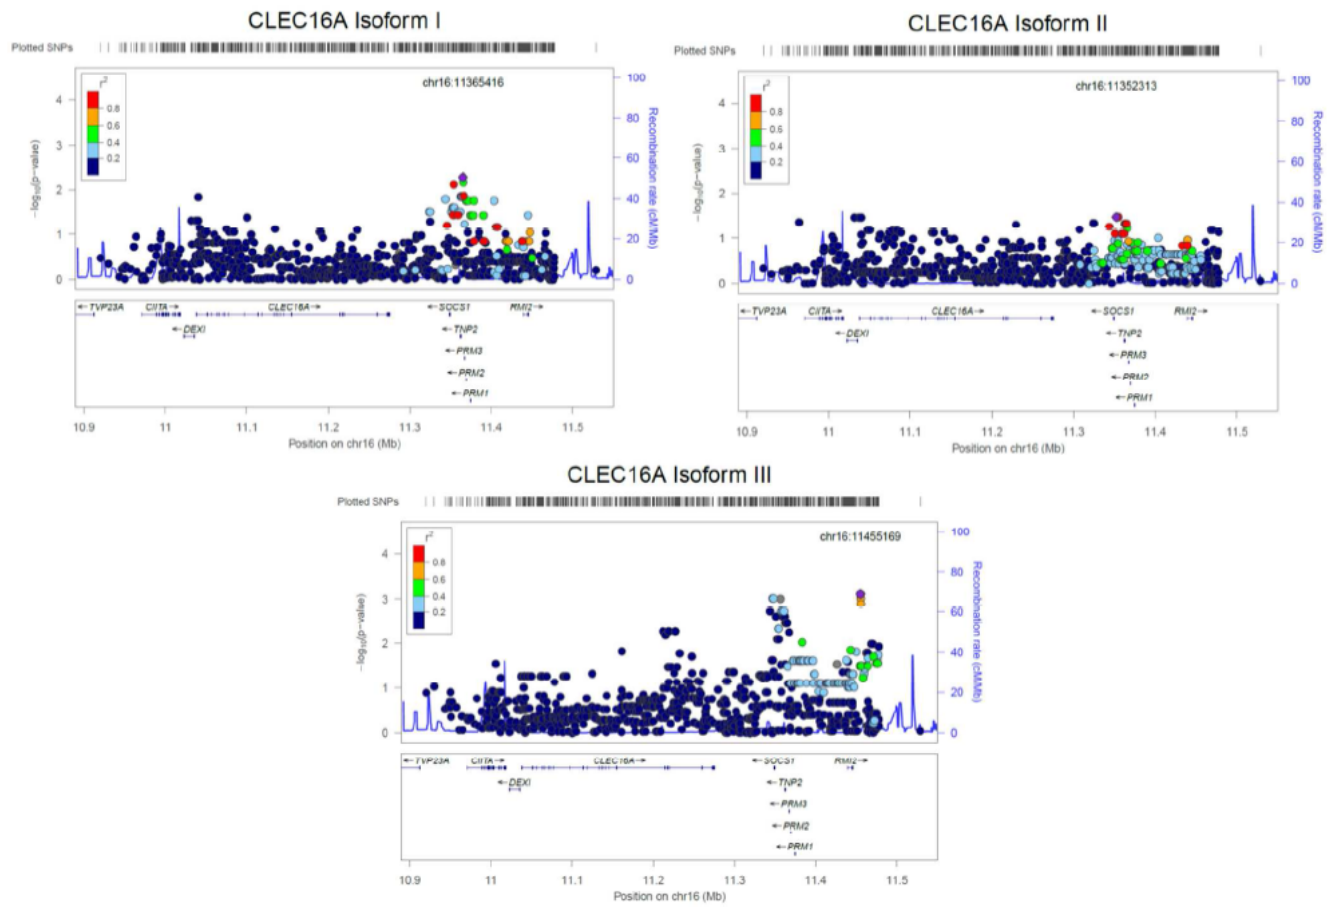

SOCS1

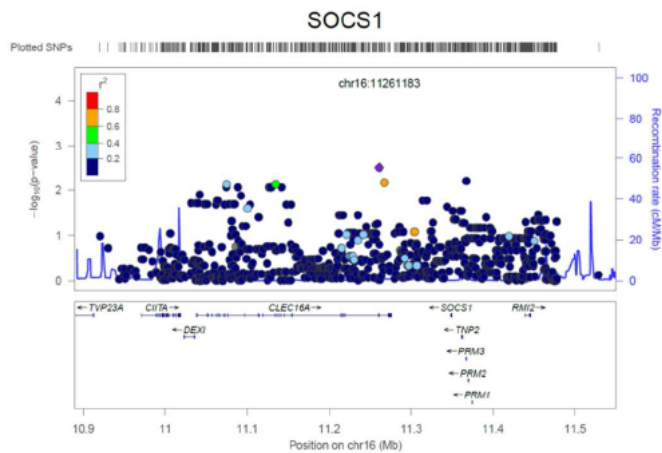

Supplement: supp_db13-1785_DB131785SupplementaryData.pdf [file supp_db13-1785_DB131785SupplementaryData.pdf]
